# Supplementary material for: Spatially resolved quantification of oxygen consumption rate in ex vivo lymph node slices
Source: Royal Society of Chemistry journal article supplement (doi:10.1039/d4an00028e), 2024-01-01
Supplement: d4an00028e4.pdf [file d4an00028e4.pdf]

## Supplemental Information for

### Spatially resolved quantification of oxygen consumption rate in ex vivo lymph node slices

Parastoo Anbaei<sup>\*</sup>, Marissa G. Stevens<sup>§†</sup>, Alexander G. Ball<sup>‡†</sup>, Timothy N.J. Bullock<sup>§†</sup>, and Rebecca R.

Pompano<sup>\*††</sup>

<sup>\*</sup>Department of Chemistry, University of Virginia College of Arts and Sciences, Charlottesville, Virginia 22904, United states

<sup>†</sup>Department of Biomedical Engineering, University of Virginia School of Engineering and Applied Sciences, Charlottesville, Virginia 22904, United States

<sup>‡</sup>Department of Microbiology Cancer Biology and Immunology, University of Virginia, Charlottesville, Virginia 22903, United States

<sup>§</sup>Department of Pathology, University of Virginia, Charlottesville, Virginia 22903, United States

<sup>††</sup>Carter Immunology Center and UVA Cancer Center, University of Virginia, Charlottesville, Virginia 22903, United States

## Contents

|                                                                                           |   |
|-------------------------------------------------------------------------------------------|---|
| Supplemental Figures.....                                                                 | 2 |
| Captions for supplemental movies.....                                                     | 3 |
| Supplemental Tables.....                                                                  | 4 |
| Supplemental assumptions and calculations .....                                           | 4 |
| Dissolved oxygen calculations and assumptions: Converting mmHg to mM O <sub>2</sub> ..... | 4 |
| Shear stress calculation for flow of PBS in perfusion chamber.....                        | 5 |
| Rates of oxygen consumption: Assumptions and calculations .....                           | 6 |
| Supporting references .....                                                               | 8 |

## Supplemental Figures

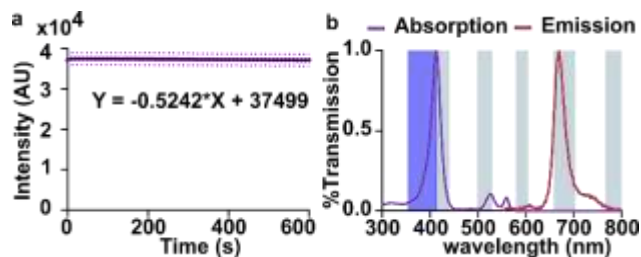

**Figure S1: Characterization of the photostability and absorption and emission spectra of the PdTFPP sensor.** (a) Luminescent intensity (arbitrary units) of the PdTFPP oxygen sensor film in gas phase 100% nitrogen over 45 min. Images were collected every 10 s at 150 ms exposure time; the shutter was closed between exposures. (b) Absorption (purple) and emission (red) spectra of PdTFPP. The wavelengths of the pentapass emission filter (grey; Zeiss Filter set LED 112) and of the DAPI excitation LED (dark blue) are also shown.

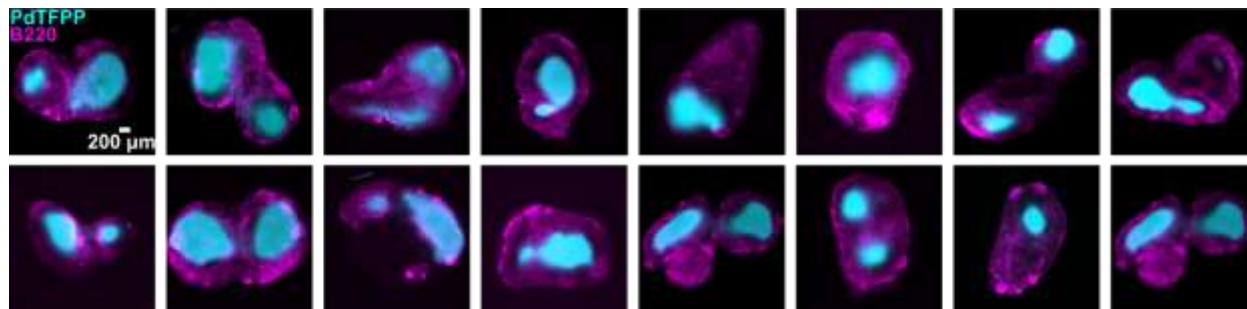

**Figure S2: Distribution of oxygen consumption in lymph node slices from naïve mice.** Each image was collected 5 minutes after the lymph node tissue slice was placed onto the perfusion chamber and the flow of oxygenated PBS was stopped. Oxygen was consumed mostly in T cell regions of the slices (PdTFPP oxygen sensor in cyan). The B cell regions were stained with B220 (magenta).

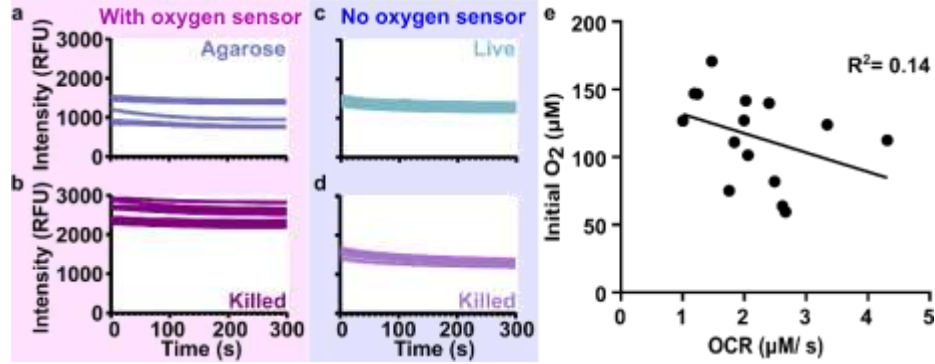

**Figure S3: The photobleaching rates of PdTFPP oxygen sensor film and of tissue autofluorescence in oxygenated PBS.** (a,b) Plot of fluorescence signal from the PdTFPP oxygen sensor over time during imaging of (a) an agarose slice or (b) an ethanol-killed tissue slice. The shutter was closed between the takes. (c,d) Plots of fluorescence signal from (c) live and (d) ethanol-killed slices without the oxygen sensor over time. N = 6 slices for all conditions; each curve shows one slice. Same y-axis scale as in (a,b). (e) Correlation plot between the initial O<sub>2</sub> concentration and the initial rate of O<sub>2</sub> consumption in live tissue slices, for the data shown in Figure 4e. The strength of a linear association between the two variables was measured using a two-tailed Pearson correlation coefficient test, and the R squared value of 0.14 indicated no correlation between the variables.

### Captions for supplemental movies

Movies showing fluorescent signal from PdTFPP oxygen sensor overlaid with live and killed lymph node tissue slices. Images were taken every 5 seconds for a total of 5 minutes. PdTFPP signal is in cyan color and B220 (B cell biomarker) is in magenta color. Three movies are provided; two representative of live slices and one for killed slices.

## Supplemental Tables

**Table S1: Fluorescent antibodies used to label cells for fluorescence microscopy.**

| Biomarker/ reagents | Clone   | LOT     | CAT    | Vendor    |
|---------------------|---------|---------|--------|-----------|
| CD16/32             | 93      | B298973 | 101302 | Biolegend |
| B220                | RA3-6B2 | B243962 | 103226 | Biolegend |

## Supplemental assumptions and calculations

*Dissolved oxygen calculations and assumptions: Converting mmHg to mM O<sub>2</sub>*

Dissolved oxygen concentration in solution is affected by factors such as atmospheric pressure and the solubility of O<sub>2(g)</sub> in the liquid, which is inversely proportional to solvent temperature and ionic strength. To calculate the solubility of oxygen gas in PBS, we used Henry's law of solubility (Eq. S 1). This Law provides a mathematical description of gas solubility in a liquid medium. According to Henry's law, at a constant temperature, the solubility of a gas in a liquid is directly proportional to the partial pressure of the gas above the liquid at equilibrium.

$$C = \partial P_{gas} / H \quad \text{Eq. S 1}$$

Where  $C$  is the solubility of a gas at a fixed temperature in a particular solvent (mM),  $H$  is Henry's law constant (mmHg/ mM), and  $\partial P_{gas}$  is the partial pressure of the gas (mmHg). The Henry's law constant for a solution is dependent on the concentration of electrolytes and proteins, atmospheric pressure, and temperature of the solution. Here, we assumed a standard atmospheric pressure of 760 mmHg and temperature of 37 °C for all experiments. Ionic strength of the 1x PBS used here (LONZA; Catalog No: 17-516F) was calculated to be 166 mM at pH 7.4.

Next, we determined the partial pressure of O<sub>2</sub> in the cell culture incubator and in the stage-top chamber used for the optical assay. At 37 °C and 100% humidity (inside incubator), water vapor exerts a partial pressure of 47 mmHg.<sup>1</sup> Therefore, water vapor will make up 6.2% of the total gas at sea level (47 mmHg/760 mmHg). To calculate the final O<sub>2</sub>% in the gas phase under different conditions used for cell culture, we used the following equation:

$$\%O_2 \text{ final} = (\%O_2 \text{ initial} \times (1 - \%gas_{(l)} - \%gas_{(n)} + \dots)) \times 100 \quad \text{Eq. S 2}$$

Therefore, for the following conditions we have the following sample calculation:

- Humidified incubator without 5% CO<sub>2</sub> (Place et al. 2017)
 
$$\%O_2 \text{ final} = [\%O_2 \text{ initial}_{(\text{atmospheric})} \times (1 - \% \text{ H}_2\text{O vapor})] \times 100$$

$$\%O_2 \text{ final} = [0.21 \times (1 - 0.062)] \times 100 = 19.7\%$$

$$PO_2 = 760 \text{ mmHg} \times \%O_2$$

$$PO_2 = 760 \text{ mmHg} \times 0.197 = 149.7 \text{ mmHg}$$

The extrapolated dissolved oxygen concentration at ionic strength of 166 mM in a humidified incubator without CO<sub>2</sub> is 0.195 mM (Place et al. 2017, Supplemental Table 1).<sup>2-4</sup> Henry's constant under these known conditions can be solved as follows:

- Incubator without 5% CO<sub>2</sub>

$$H = \partial P_{\text{gas}}/C = 149.7 \text{ mmHg} / 0.195 \text{ mM}; H = 767.69 \text{ mmHg/mM}$$

Therefore, we used 767.69 mmHg/mM as the Henry's constant for conversions between mmHg to mM O<sub>2</sub> throughout the manuscript.

#### *Shear stress calculation for flow of PBS in perfusion chamber*

To estimate the fluid shear stress (FSS) resulting from the flow of 1x PBS through the perfusion chamber, we assumed a thin rectangular cross section (Eq. S 3)<sup>5</sup>:

$$FSS = (6\eta Q) / (h^2 \times w) \quad \text{Eq. S 3}$$

Where  $\eta$  is fluid viscosity,  $Q$  is fluid flow rate,  $h$  is height of the bath, and  $w$  is width of the bath. For the closed bath chamber, we have  $Q = 3.6 \text{ mL/min} = 0.06 \text{ cm}^3/\text{s}$ ,  $\eta$  of PBS = approximately  $1.00 \times 10^{-3} \text{ Pa}\cdot\text{s}$ ,<sup>6</sup>  $h = 0.25 \text{ cm}$ , and  $w = 1.3 \text{ cm}$  (Warner Instruments). Thus, the fluid shear stress is calculated as

$$FSS = \frac{[(6)(1.00 \times 10^{-3} \text{ Pa}\cdot\text{s}) \left(0.06 \frac{\text{cm}^3}{\text{s}}\right)]}{(0.25 \text{ cm})^2 (1.3 \text{ cm})} = 0.004 \text{ Pa}$$

Converting from Pa to dyn/cm<sup>2</sup> (1 Pa = 10 dyn/cm<sup>2</sup>), we have an estimated  $FSS$  of 0.044 dyn/cm<sup>2</sup> in the chamber under these conditions.

#### *Rates of oxygen consumption: Assumptions and calculations*

At each time point, the fluorescence intensities from the oxygen sensor film were collected in mean grey value, which was converted to [dissolved O<sub>2</sub>] (mM) by using the oxygen calibration curve for the perfusion chamber (Stern-Volmer equation, Eq. 1 from main text) and Henry's law. After generating a plot of [O<sub>2</sub>] (mM) vs time (s), the initial portion of the curve was fit with a linear fit, and the mean rate of consumption per tissue slice (mM/s) was obtained from the absolute value of the slope (Figure 4d-f).

To compare the optical assay to the results from a Seahorse assay, it was necessary to convert between units of mM/s per T cell zone and pmol/min/cell. Doing so required a series of assumptions and simplifications, yielding an order-of-magnitude comparison between the two measurements. To convert from molarity to moles by using the molarity equation (Eq. S 4),

$$\text{Molarity} = \text{moles of substrate} / \text{volume of solution} \quad \text{Eq. S 4}$$

We estimated the average volume (area x height) of the T cell zone in a lymph node slice. To determine an average area, we performed immunofluorescence labelling of lymph node slices, defined the T cell zones as central B220-negative regions (see e.g. Figure 3c from main text), and measured the areas of these

regions using ImageJ. Measurements in 12 naïve lymph node slices from 6 wks old male and female mice yield an average area of  $1.01 \times 10^6 \pm 0.26 \times 10^6 \mu\text{m}^2$ . Assuming a thickness of 300  $\mu\text{m}$ , this yielded an average volume of  $3.02 \times 10^8 \mu\text{m}^3$ .

To convert from moles per T cell zone to moles per cell, we estimated an average number of T cells per T cell zone. To do so, we referred to the average percent composition of CD3<sup>+</sup> T cells per lymph node (50  $\pm$  17%) and the average number of cells per 300- $\mu\text{m}$ -thick lymph node slice ( $(0.56 \pm 0.16) \times 10^6$  cells).<sup>7</sup> Assuming each murine lymph node slice had two T cell zones (most have one or two zones; see Figure S2), this yielded a rough order-of-magnitude estimate of 140,000 T cells per T cell zone in a lymph node slice.

As an example, using these numbers, for a T cell zone in which the oxygen consumption rate was  $19 \times 10^{-4}$  mM/sec as measured by the optical assay, we estimated that  $2.4 \times 10^{-4}$  pmol/min/cell was consumed.

## Supporting references

- (1) Pittman, R. N. Regulation of Tissue Oxygenation. *Colloq. Ser. Integr. Syst. Physiol. Mol. Funct.* **2011**, *3* (3), 1–100. <https://doi.org/10.4199/C00029ED1V01Y201103ISP017>.
- (2) Carpenter, J. H. New Measurements of Oxygen Solubility in Pure and Natural Water. *Limnol. Oceanogr.* **1966**, *11* (2), 264–277. <https://doi.org/10.4319/lo.1966.11.2.0264>.
- (3) Koppenol, W. H.; Butler, J. Energetics of Interconversion Reactions of Oxyradicals. *Adv. Free Radic. Biol. Med.* **1985**, *1* (1), 91–131. [https://doi.org/10.1016/8755-9668\(85\)90005-5](https://doi.org/10.1016/8755-9668(85)90005-5).
- (4) Place, T. L.; Domann, F. E.; Case, A. J. Limitations of Oxygen Delivery to Cells in Culture: An Underappreciated Problem in Basic and Translational Research. *Free Radic. Biol. Med.* **2017**, *113*, 311–322. <https://doi.org/10.1016/j.freeradbiomed.2017.10.003>.
- (5) Oh, K. W.; Lee, K.; Ahn, B.; Furlani, E. P. Design of Pressure-Driven Microfluidic Networks Using Electric Circuit Analogy. *Lab. Chip* **2012**, *12* (3), 515–545. <https://doi.org/10.1039/C2LC20799K>.
- (6) Jun Kang, Y.; Yeom, E.; Lee, S.-J. A Microfluidic Device for Simultaneous Measurement of Viscosity and Flow Rate of Blood in a Complex Fluidic Network. *Biomicrofluidics* **2013**, *7* (5), 054111. <https://doi.org/10.1063/1.4823586>.
- (7) Belanger, M. C.; Ball, A. G.; Catterton, M. A.; Kinman, A. W. L.; Anbaei, P.; Groff, B. D.; Melchor, S. J.; Lukens, J. R.; Ross, A. E.; Pompano, R. R. Acute Lymph Node Slices Are a Functional Model System to Study Immunity Ex Vivo. *ACS Pharmacol. Transl. Sci.* **2021**, *4* (1), 128–142. <https://doi.org/10.1021/acsptsci.0c00143>.
